# Supplementary material for: The Effect of Amino Acids on Production of SCFA and bCFA by Members of the Porcine Colonic Microbiota
Source: MDPI journal article supplement (doi:10.3390/microorganisms10040762), 2022-03-31
Supplement: s1 [file s1]

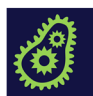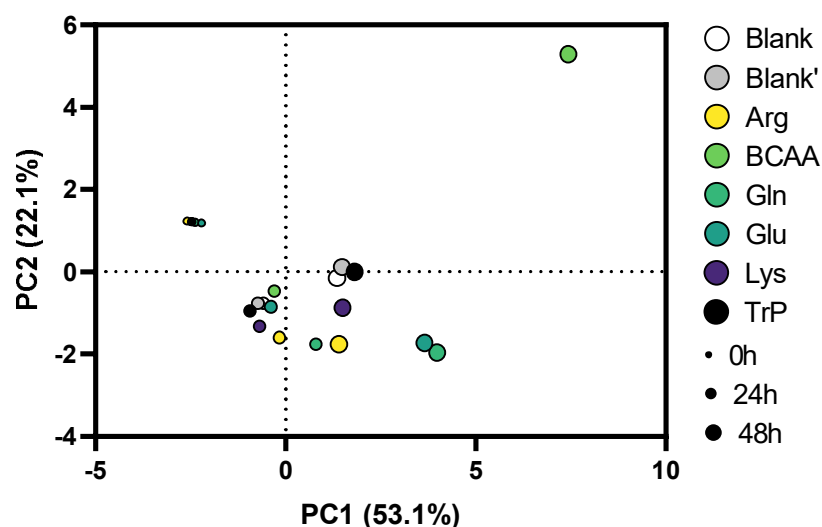

**Figure S1.** PCA based on microbial metabolic activity on different time points (0h, 24h and 48h) during the incubation of porcine colonic microbiota in presence of various amino acids *versus* the untreated control incubations (Blank and Blank'). The experiment was performed in two different runs. While run 1 consisted of testing blank, Arg, BCAA, Lys and Trp, run 2 consisted of blank', Gln and Glu.

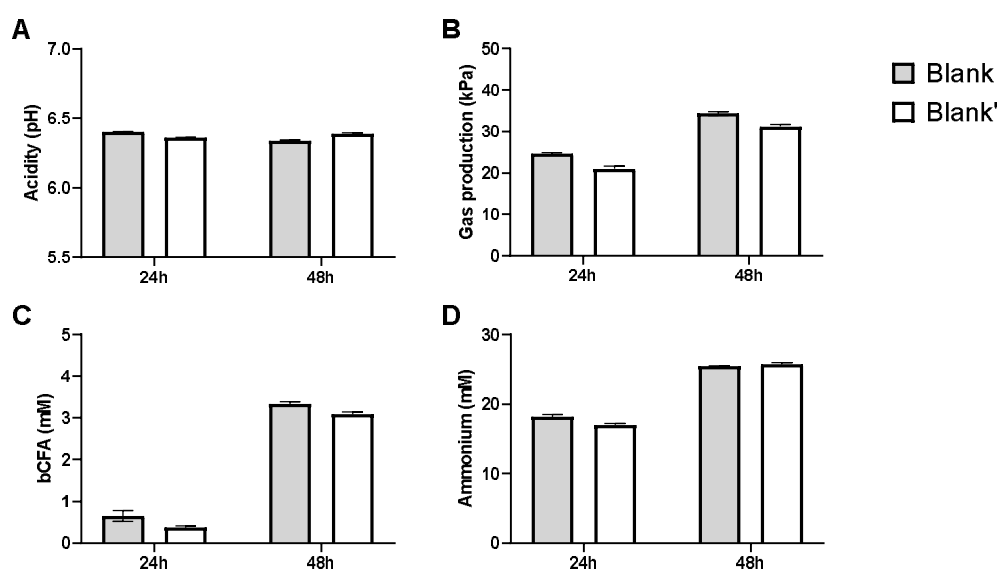

**Figure S2.** Average ( $\pm$  SD) acidity (pH), gas production (kPa), and markers of proteolytic fermentation (ammonium and bCFA (= sum of isobutyrate, isovalerate and isocaproate)) during both blank incubations (Blank and Blank') with a porcine colonic microbiota ( $n = 3$ ).

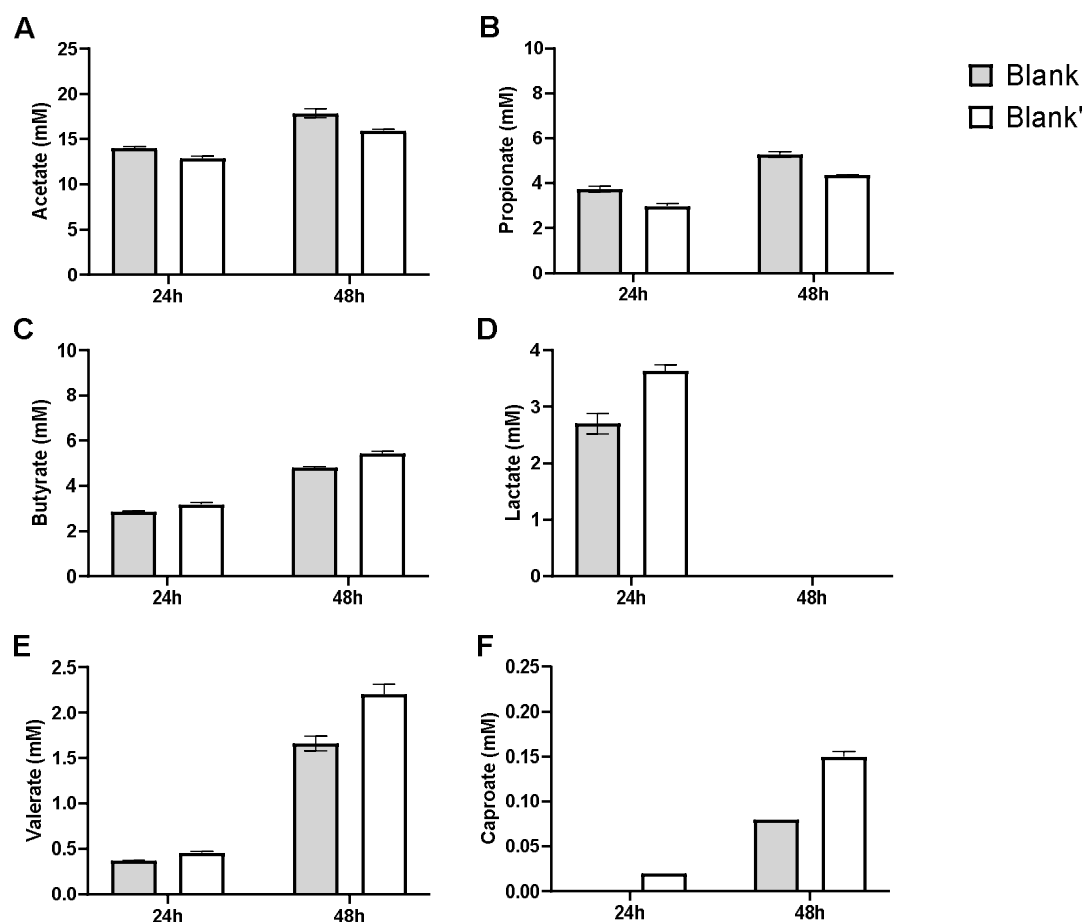

**Figure S1.** Average (± SD) SCFA (acetate, propionate, butyrate, valerate and caproate) and lactate (mM) levels during both blank incubations (Blank and Blank') with a porcine colonic microbiota (n = 3).

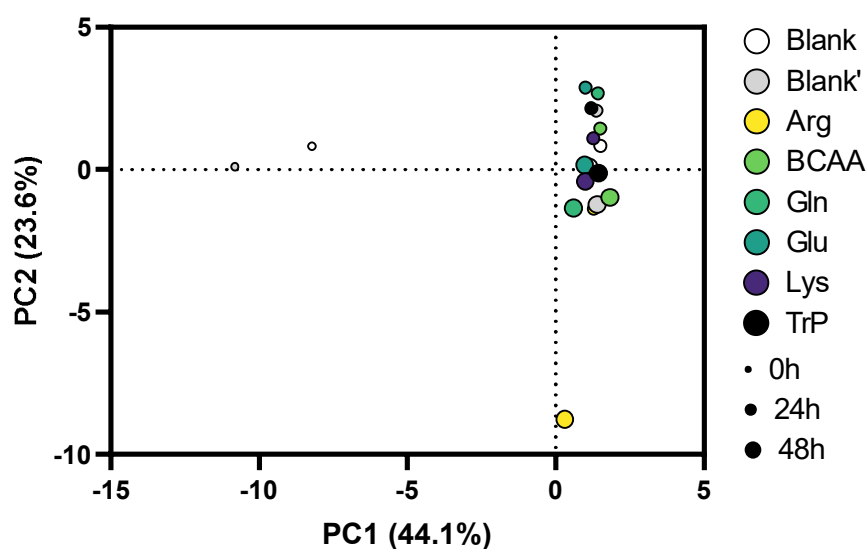

**Figure S4.** PCA based on microbial community composition (family level; absolute values, estimated upon multiplying with total cell counts (cells/mL)) on different time points (0h, 24h and 48h) during the incubation of porcine colonic microbiota in presence of various amino acids *versus* untreated control incubations (Blank and Blank'). The experiment was performed on two different occasions. While run 1 consisted of testing blank, Arg, BCAA, Lys and Trp, run 2 consisted of testing blank', Gln and Glu.

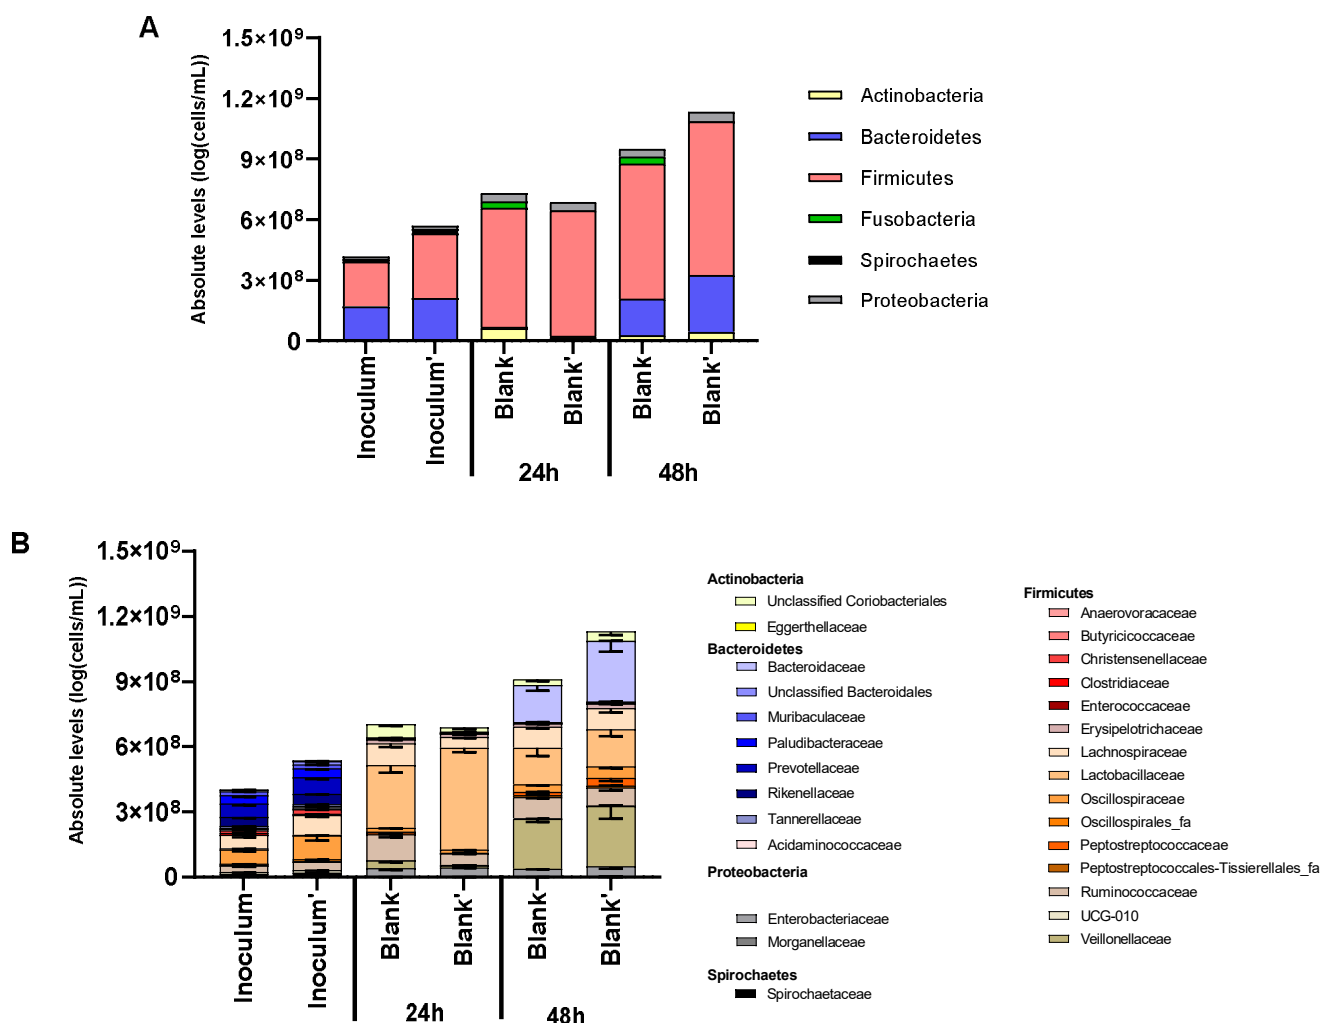

**Figure S5.** Microbial composition at phylum (A) and family level (B), expressed as absolute values (estimated upon multiplying proportions (%) based on 16S rRNA gene profiling with total cell counts) at the start and after 24h and 48h of incubation during two blank incubations (Blank and Blank') with a porcine colonic microbiota (n = 3). Values are expressed as averages ( $\pm$  SD) measured during the two independent runs performed during the project.

**Table S1.** Microbial composition at family level, expressed as absolute values (estimated upon multiplying proportions (%) based on 16S rRNA gene profiling with total cell counts) at the start and after 24h and 48h of incubation during two blank incubations (Blank and Blank') with a porcine colonic microbiota (n = 3). Values are expressed as averages ( $\pm$  SD) measured during the two independent runs performed during the project.

| Phylum         | Family                              | 0h        |            | 24h   |        | 48h   |        |
|----------------|-------------------------------------|-----------|------------|-------|--------|-------|--------|
|                |                                     | Inocu-lum | Inocu-lum' | Blank | Blank' | Blank | Blank' |
| Actinobacteria | Unclassified Coriobacteriales       | 5.70      | 5.93       | 7.79  | 7.27   | 7.40  | 7.63   |
|                | Eggerthellaceae                     | 5.60      | 5.69       | 5.90  | 5.69   | 5.95  | 6.06   |
| Bacteroidetes  | Bacteroidaceae                      | 5.55      | 5.85       | 6.31  | 6.58   | 8.23  | 8.44   |
|                | Unclassified Bacteroidales          | 6.92      | 7.15       | 4.68  | 4.78   | < LOQ | 5.11   |
|                | Muribaculaceae                      | 7.20      | 7.31       | 5.83  | 5.74   | 5.36  | 5.77   |
|                | Paludibacteraceae                   | 7.58      | 7.63       | 5.10  | 5.05   | 5.14  | < LOQ  |
|                | Prevotellaceae                      | 7.80      | 7.87       | 5.70  | 5.72   | 5.30  | 5.75   |
|                | Rikenellaceae                       | 7.62      | 7.67       | 6.21  | 6.22   | 5.90  | 6.15   |
|                | Tannerellaceae                      | 6.86      | 7.05       | 5.39  | 5.35   | 6.40  | 5.91   |
|                | Acidaminococcaceae                  | 6.56      | 6.64       | 5.45  | 5.76   | 5.77  | 6.11   |
| Firmicutes     | Anaerovoracaceae                    | 6.51      | 6.71       | 5.70  | 5.45   | 5.81  | 5.78   |
|                | Butyricocccaceae                    | 6.72      | 6.71       | 5.54  | 5.54   | 5.67  | 5.93   |
|                | Christensenellaceae                 | 7.09      | 7.27       | 5.73  | 5.83   | 5.84  | 6.17   |
|                | Clostridiaceae                      | 6.94      | 6.64       | 5.87  | 5.79   | 6.15  | 6.03   |
|                | Enterococcaceae                     | < LOQ     | < LOQ      | 4.82  | 4.93   | 5.34  | 5.76   |
|                | Erysipelotrichaceae                 | 6.06      | 6.31       | 7.26  | 7.17   | 7.12  | 7.25   |
|                | Lachnospiraceae                     | 7.80      | 7.96       | 8.01  | 7.69   | 7.98  | 8.00   |
|                | Lactobacillaceae                    | 6.77      | 6.50       | 8.46  | 8.67   | 8.22  | 8.22   |
|                | Oscillospiraceae                    | 7.82      | 8.04       | 7.27  | 7.13   | 7.55  | 7.72   |
|                | Oscillospirales                     | 6.48      | 6.85       | 5.31  | 5.36   | 5.26  | 5.47   |
|                | Peptostreptococcaceae               | 6.55      | 6.40       | 7.00  | 6.19   | 7.17  | 7.54   |
|                | Peptostreptococcales-Tissierellales | < LOQ     | < LOQ      | 5.61  | 5.67   | 6.83  | 7.06   |
|                | Ruminococcaceae                     | 7.50      | 7.60       | 8.07  | 7.74   | 8.00  | 7.91   |
|                | UCG-010                             | 6.90      | 7.08       | 5.85  | 5.72   | 6.30  | 6.32   |
|                | Veillonellaceae                     | 5.36      | 5.10       | 7.55  | 7.06   | 8.36  | 8.45   |
| Proteobacteria | Enterobacteriaceae                  | < LOQ     | < LOQ      | 7.60  | 7.61   | 7.57  | 7.65   |
|                | Morganellaceae                      | < LOQ     | < LOQ      | 5.83  | 6.12   | 5.70  | 6.40   |
| Spirochaetes   | Spirochaetaceae                     | 7.13      | 7.29       | 5.49  | 5.71   | 5.45  | 5.88   |

**Table S2.** Effect of amino acids on microbial composition (phylum level; absolute values, estimated upon multiplying proportions (%) based on 16S rRNA gene profiling with total cell counts) after 24h and 48h of incubation with a porcine colonic microbiota (n = 3). The data is presented as the average difference between the log<sub>10</sub>-transformed absolute abundance (log(cells/mL)) in a treatment *versus* the corresponding untreated blank incubation. A value below zero indicates a decrease upon treatment, while a value above zero, indicates that this phylum is stimulated by a given amino acid. Statistically significant differences as compared to this blank are indicated in bold ( $p < 0.05$ ).

| Phylum         | 24h         |       |              |             |       |              | 48h         |             |       |             |             |             |
|----------------|-------------|-------|--------------|-------------|-------|--------------|-------------|-------------|-------|-------------|-------------|-------------|
|                | Arg         | BCAA  | Gln          | Glu         | Lys   | Trp          | Arg         | BCAA        | Gln   | Glu         | Lys         | Trp         |
| Actinobacteria | -0.03       | -0.11 | -0.13        | -0.08       | -0.19 | <b>-0.39</b> | <b>0.65</b> | <b>0.46</b> | -0.18 | 0.07        | 0.32        | <b>0.30</b> |
| Bacteroidetes  | <b>1.23</b> | -0.23 | <b>-0.39</b> | -0.33       | 0.93  | <b>-0.79</b> | <b>0.33</b> | 0.00        | 0.02  | -0.09       | 0.03        | -0.04       |
| Firmicutes     | 0.01        | 0.00  | 0.04         | -0.11       | -0.06 | <b>-0.24</b> | -0.04       | 0.06        | 0.06  | 0.11        | -0.05       | -0.12       |
| Proteobacteria | 0.01        | -0.10 | -0.19        | <b>0.23</b> | 0.03  | <b>0.42</b>  | <b>0.34</b> | 0.05        | -0.01 | <b>0.48</b> | <b>0.21</b> | <b>0.79</b> |
| Spirochaetes   | 0.03        | 0.02  | -0.22        | -0.11       | -0.07 | -0.37        | 0.34        | -0.02       | 0.13  | 0.06        | -0.05       | -0.33       |

**Table S3.** Effect of amino acids on microbial composition (family level; absolute values, estimated upon multiplying proportions (%) based on 16S rRNA gene profiling with total cell counts) after 24h of incubation with a porcine colonic microbiota (n = 3). The data is presented as the average difference between the log<sub>10</sub>-transformed absolute abundance (log(cells/mL)) in a treatment *versus* the corresponding untreated blank incubation. A value below zero indicates a decrease upon treatment, a value above zero, indicates that this family is stimulated by a given amino acid. Statistically significant differences as compared to this blank are indicated in bold ( $p < 0.05$ ).

| Phylum         | Family                                     | Arg          | BCAA         | Gln          | Glu          | Lys         | Trp          |
|----------------|--------------------------------------------|--------------|--------------|--------------|--------------|-------------|--------------|
| Actinobacteria | Unclassified <i>Coriobacteriales</i>       | -0.09        | -0.12        | -0.11        | -0.11        | -0.17       | <b>-0.40</b> |
|                | <i>Eggerthellaceae</i>                     | <b>0.94</b>  | -0.01        | -0.10        | 0.10         | -0.12       | <b>-0.20</b> |
| Bacteroidetes  | <i>Bacteroidaceae</i>                      | <b>1.62</b>  | -0.31        | -0.71        | <b>-1.93</b> | -0.85       | <b>-1.41</b> |
|                | Unclassified <i>Bacteroidales</i>          | 0.26         | 0.03         | -0.09        | 0.29         | 0.15        | -0.21        |
|                | <i>Muribaculaceae</i>                      | <b>1.37</b>  | -0.16        | -0.10        | -0.10        | <b>0.66</b> | <b>-0.72</b> |
|                | <i>Paludibacteraceae</i>                   | -0.35        | -0.35        | -0.16        | 0.22         | 0.21        | -0.18        |
|                | <i>Prevotellaceae</i>                      | -0.32        | -0.26        | <b>-0.23</b> | 0.06         | 0.02        | <b>-0.66</b> |
|                | <i>Rikenellaceae</i>                       | -0.38        | -0.23        | <b>-0.24</b> | 0.02         | -0.01       | <b>-0.65</b> |
|                | <i>Tannerellaceae</i>                      | <b>0.87</b>  | -0.26        | -0.01        | -0.26        | -0.06       | -0.42        |
|                | <i>Acidaminococcaceae</i>                  | <b>0.57</b>  | -0.45        | 0.08         | 0.15         | 0.14        | -0.36        |
| Firmicutes     | <i>Anaerovoracaceae</i>                    | -0.28        | -0.29        | 0.16         | -0.17        | 0.05        | -0.12        |
|                | <i>Butyrificoccaceae</i>                   | -0.11        | -0.23        | 0.07         | 0.32         | -0.12       | -0.24        |
|                | <i>Christensenellaceae</i>                 | 0.10         | -0.04        | -0.06        | 0.05         | 0.05        | -0.28        |
|                | <i>Clostridiaceae</i>                      | 0.24         | -0.20        | -0.25        | 0.08         | 0.01        | -0.22        |
|                | <i>Enterococcaceae</i>                     | 1.57         | 0.35         | -0.01        | -0.28        | -0.03       | -0.08        |
|                | <i>Erysipelotrichaceae</i>                 | 0.07         | -0.25        | -0.23        | <b>-1.70</b> | -0.07       | <b>-0.74</b> |
|                | <i>Lachnospiraceae</i>                     | 0.09         | <b>-0.22</b> | <b>-0.30</b> | <b>-0.57</b> | -0.06       | <b>-0.51</b> |
|                | <i>Lactobacillaceae</i>                    | 0.00         | -0.02        | -0.08        | -0.16        | -0.02       | -0.09        |
|                | <i>Oscillospiraceae</i>                    | <b>0.13</b>  | <b>-0.23</b> | <b>0.34</b>  | 0.02         | -0.04       | <b>-0.29</b> |
|                | <i>Oscillospirales</i>                     | 0.09         | -0.46        | -0.12        | -0.26        | -0.03       | -0.44        |
|                | <i>Peptostreptococcaceae</i>               | -0.42        | -0.22        | -0.36        | -0.31        | -0.60       | -0.49        |
|                | <i>Peptostreptococcales-Tissierellales</i> | 0.32         | -0.38        | -0.53        | <b>-1.17</b> | -0.47       | -0.61        |
|                | <i>Ruminococcaceae</i>                     | <b>-0.16</b> | -0.09        | <b>0.51</b>  | <b>0.19</b>  | -0.10       | <b>-0.37</b> |
|                | UCG-010                                    | -0.07        | <b>-0.33</b> | -0.24        | -0.02        | 0.10        | <b>-0.61</b> |
|                | <i>Veillonellaceae</i>                     | 0.23         | <b>0.55</b>  | <b>0.24</b>  | <b>0.42</b>  | 0.20        | <b>-0.98</b> |
| Proteobacteria | <i>Enterobacteriaceae</i>                  | -0.01        | -0.09        | -0.19        | <b>0.24</b>  | 0.12        | <b>0.43</b>  |
|                | <i>Morganellaceae</i>                      | 0.05         | 0.15         | -0.60        | -1.06        | -0.18       | -0.11        |
| Spirochaetes   | <i>Spirochaetaceae</i>                     | 0.01         | 0.04         | -0.22        | -0.12        | 0.04        | -0.35        |
